# Supplementary material
Source: PubMed Central journal article supplement (PMC4790028)
Supplement: lepp001743.wf1_default.pdf [file lepp001743.wf1_default.pdf]

**Figure 1**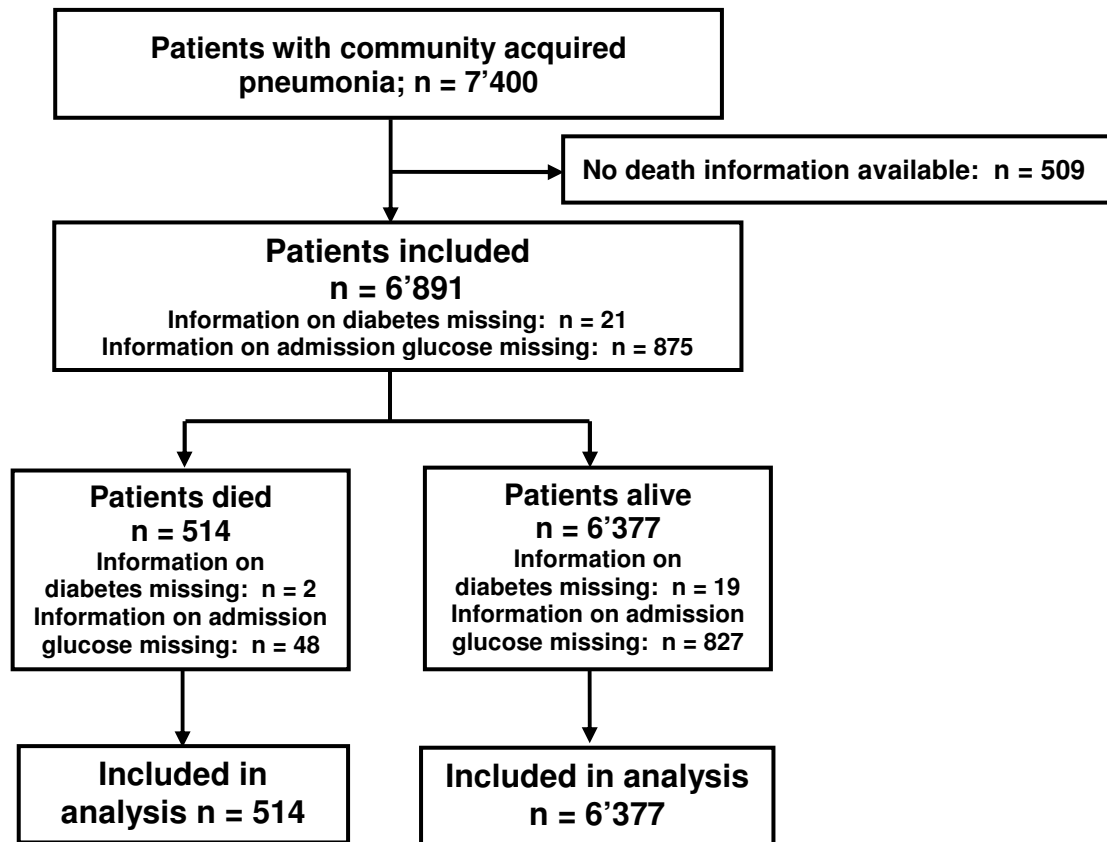

**Supplementary Figure 1:** Flow chart demonstrating patients included in this study and how they were stratified for the analysis (data is derived from mortality at 90 days). For statistical analyses, missing data on glucose levels on admission from 875 patients was accounted for in the covariates by using multiple imputation to create 20 imputed datasets (see text).

**Patients with diabetes**

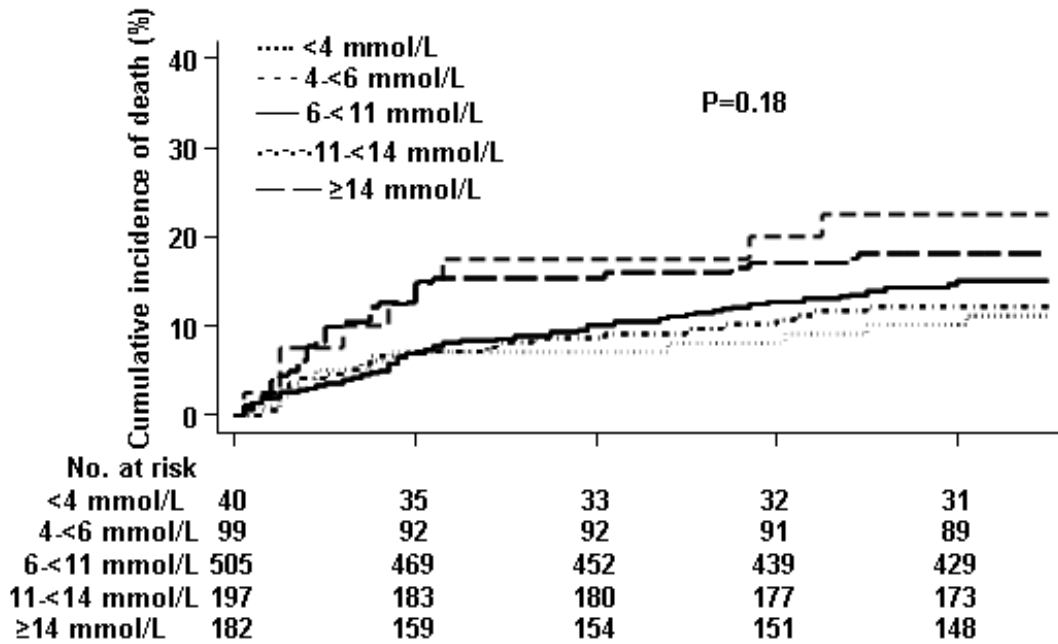

**Supplementary Figure 2:** Depiction of cumulative incidence of death (%) in patients with diabetes. In patients with diabetes there was no statistically significant association between serum glucose levels on admission and mortality after 90 days (P = 0.18).

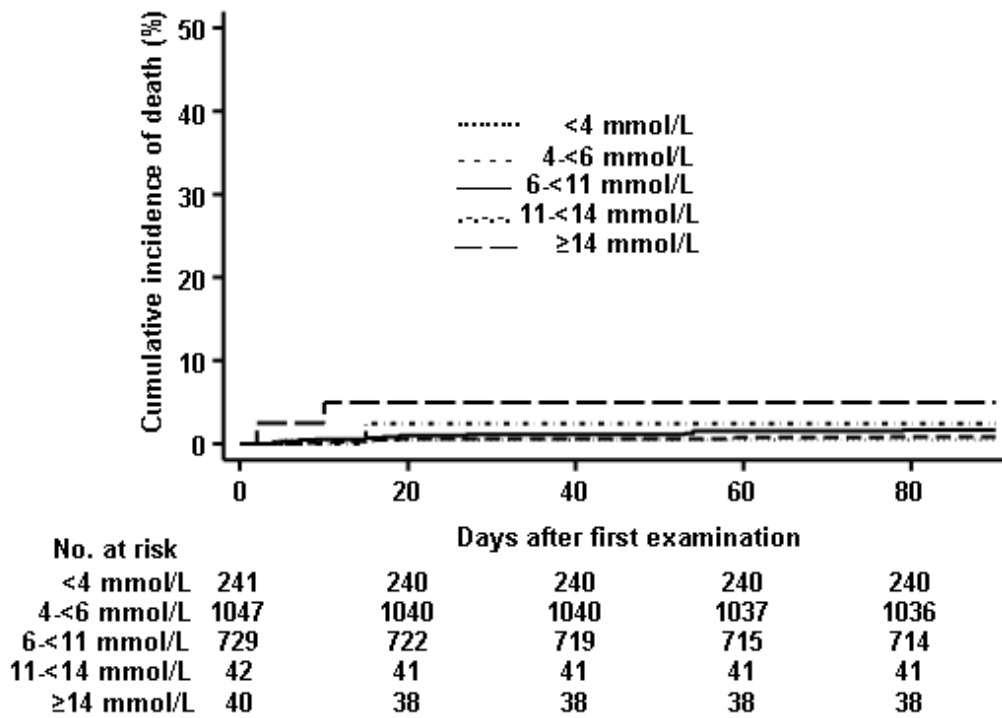

**Supplementary Figure 3 A:** Depiction of cumulative incidence of death (%) in patients with a CRB-65 score of 0. In patients with a low CRB-65 score there was borderline statistically significant association between serum glucose levels on admission and mortality after 90 days ( $P = 0.035$ ).

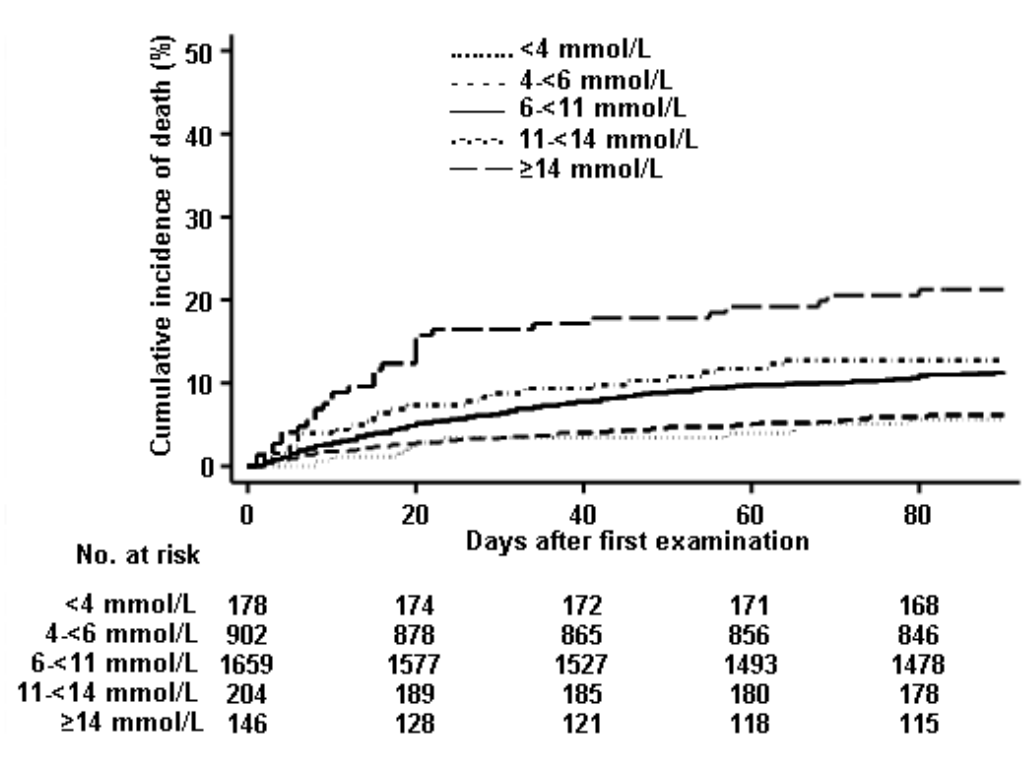

**Supplementary Figure 3 B:** Depiction of cumulative incidence of death (%) in patients with a CRB-65 score of 1 or 2. In patients with a moderate CRB-65 score there was a statistically significant association between serum glucose levels on admission and mortality after 90 days ( $P \leq 0.001$ ).

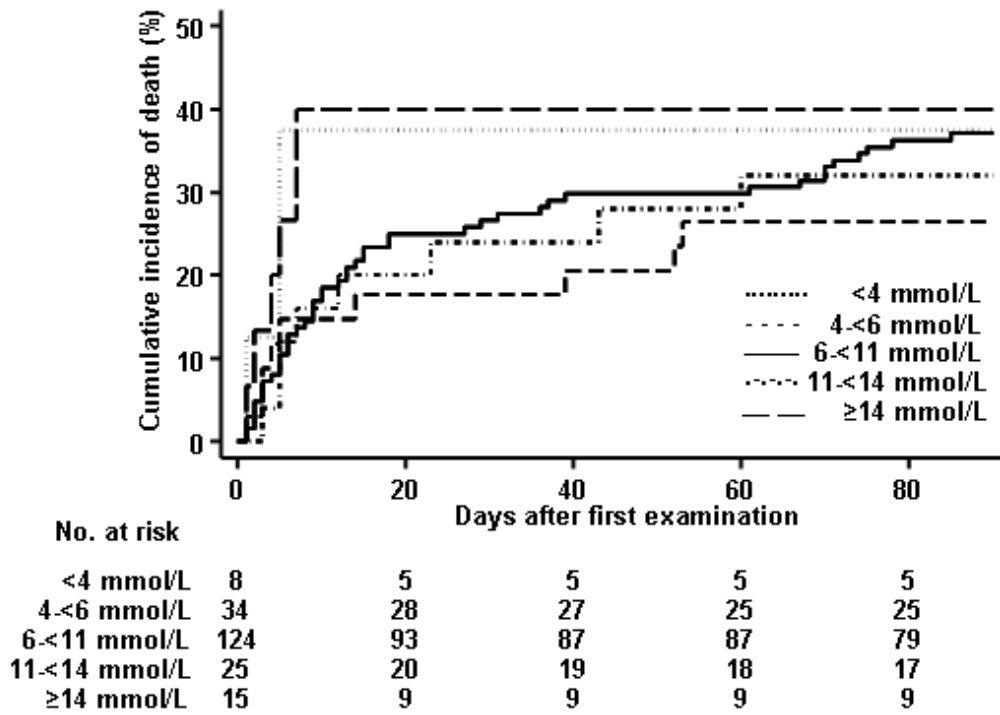

**Supplementary Figure 3 C:** Depiction of cumulative incidence of death (%) in patients with a CRB-65 score of 3 or 4. In patients with a high CRB-65 score there was no statistically significant association between serum glucose levels on admission and mortality after 90 days ( $P = 0.70$ ).

**Supplementary Table 1A: 28-day mortality in all patients with CAP.**

|                           | <b>Crude analyses<br/>Hazard ratio</b> | <b>P-value</b> | <b>Adjusted analyses<br/>Hazard ratio</b> | <b>P-value</b> |
|---------------------------|----------------------------------------|----------------|-------------------------------------------|----------------|
| <b>Diabetes</b>           |                                        | <0.001         |                                           | 0.042          |
| No                        | 1.00 (ref)                             |                | 1.00 (ref)                                |                |
| Yes                       | 2.56 (2.02 to 3.23)                    |                | 1.29 (1.01 to 1.65)                       |                |
| <b>Glucose levels</b>     |                                        | <0.001*        |                                           | <0.001*        |
| <4 mmol/L                 | 1.07 (0.59 to 1.97)                    |                | 1.27 (0.69 to 2.34)                       |                |
| 4-<6 mmol/L               | 1.00 (ref)                             |                | 1.00 (ref)                                |                |
| 6-<11 mmol/L              | 2.88 (2.11 to 3.94)                    |                | 1.52 (1.10 to 2.10)                       |                |
| 11-<14 mmol/L             | 4.56 (2.86 to 7.26)                    |                | 1.51 (0.93 to 2.46)                       |                |
| ≥14 mmol/L                | 8.29 (5.43 to 12.7)                    |                | 2.99 (1.91 to 4.67)                       |                |
| <b>Combined</b>           |                                        | <0.001         |                                           | 0.001          |
| No diabetes, low glucose  | 1.00 (ref)                             |                | 1.00 (ref)                                |                |
| No diabetes, high glucose | 3.45 (2.49 to 4.76)                    |                | 1.71 (1.22 to 2.40)                       |                |
| Diabetes                  | 5.43 (3.89 to 7.60)                    |                | 1.92 (1.34 to 2.75)                       |                |

Each Cox proportional hazards models adjusted for sex, CRB-65 class, co-morbidities and smoking status. High glucose defines as glucose levels ≥ 6 mmol/L. \*P values for trend across glucose levels

**Supplementary Table 1B: 90-day mortality in all patients with CAP.**

|                           | <b>Crude analyses<br/>Hazard ratio</b> | <b>P-value</b> | <b>Adjusted analyses<br/>Hazard ratio</b> | <b>P-value</b> |
|---------------------------|----------------------------------------|----------------|-------------------------------------------|----------------|
| <b>Diabetes</b>           |                                        | <0.001         |                                           | 0.022          |
| No                        | 1.00 (ref)                             |                | 1.00 (ref)                                |                |
| Yes                       | 2.47 (2.05 to 2.98)                    |                | 1.26 (1.04 to 1.54)                       |                |
| <b>Glucose levels</b>     |                                        | <0.001*        |                                           | <0.001*        |
| <4 mmol/L                 | 0.83 (0.49 to 1.39)                    |                | 0.99 (0.59 to 1.66)                       |                |
| 4-<6 mmol/L               | 1.00 (ref)                             |                | 1.00 (ref)                                |                |
| 6-<11 mmol/L              | 2.89 (2.27 to 3.69)                    |                | 1.56 (1.22 to 2.01)                       |                |
| 11-<14 mmol/L             | 4.01 (2.78 to 5.81)                    |                | 1.43 (0.97 to 2.09)                       |                |
| ≥14 mmol/L                | 6.04 (4.18 to 8.74)                    |                | 2.37 (1.62 to 3.46)                       |                |
| <b>Combined</b>           |                                        | <0.001         |                                           | <0.001         |
| No diabetes, low glucose  | 1.00 (ref)                             |                | 1.00 (ref)                                |                |
| No diabetes, high glucose | 3.35 (2.61 to 4.31)                    |                | 1.72 (1.33 to 2.23)                       |                |
| Diabetes                  | 5.14 (3.95 to 6.68)                    |                | 1.88 (1.42 to 2.47)                       |                |

Each Cox proportional hazards models adjusted for sex, CRB-65 class, co-morbidities and smoking status. High glucose defines as glucose levels ≥ 6 mmol/L. \*P values for trend across glucose levels

**Supplementary Table 1C:** 180-day mortality in all patients with CAP.

|                           | <b>Crude analyses<br/>Hazard ratio</b> | <b>P-value</b> | <b>Adjusted analyses<br/>Hazard ratio</b> | <b>P-value</b> |
|---------------------------|----------------------------------------|----------------|-------------------------------------------|----------------|
| <b>Diabetes</b>           |                                        | <0.001         |                                           | 0.004          |
| No                        | 1.00 (ref)                             |                | 1.00 (ref)                                |                |
| Yes                       | 2.48 (2.10 to 2.93)                    |                | 1.29 (1.08 to 1.54)                       |                |
| <b>Glucose levels</b>     |                                        | <0.001*        |                                           | <0.001*        |
| <4 mmol/L                 | 0.70 (0.44 to 1.14)                    |                | 0.84 (0.52 to 1.35)                       |                |
| 4-<6 mmol/L               | 1.00 (ref)                             |                | 1.00 (ref)                                |                |
| 6-<11 mmol/L              | 2.54 (2.07 to 3.12)                    |                | 1.41 (1.14 to 1.75)                       |                |
| 11-<14 mmol/L             | 3.73 (2.71 to 5.13)                    |                | 1.39 (0.99 to 1.94)                       |                |
| ≥14 mmol/L                | 4.99 (3.59 to 6.94)                    |                | 1.98 (1.40 to 2.81)                       |                |
| <b>Combined</b>           |                                        | <0.001         |                                           | <0.001         |
| No diabetes, low glucose  | 1.00 (ref)                             |                | 1.00 (ref)                                |                |
| No diabetes, high glucose | 2.88 (2.32 to 3.57)                    |                | 1.52 (1.21 to 1.91)                       |                |
| Diabetes                  | 4.61 (3.68 to 5.77)                    |                | 1.74 (1.36 to 2.21)                       |                |

Each Cox proportional hazards models adjusted for sex, CRB-65 class, co-morbidities and smoking status. High glucose defines as glucose levels ≥ 6 mmol/L. \*P values for trend across glucose levels

**Supplementary Table 2:** 90-day mortality according to standard cut-off values for normal fasting (<7.0 mmol/L) and normal non-fasting glucose levels (< 11.1 mmol/L) in all patients.

|                       | <b>Crude analyses<br/>Hazard ratio</b> | <b>p-<br/>value</b> | <b>Adjusted analyses<br/>Hazard ratio *</b> | <b>p-<br/>value</b> |
|-----------------------|----------------------------------------|---------------------|---------------------------------------------|---------------------|
| <b>Glucose levels</b> |                                        | <0.001              |                                             | <0.001              |
| <7 mmol/L             | 1.00 (ref)                             |                     | 1.00 (ref)                                  |                     |
| 7-<11 mmol/L          | 2.63 (2.16 to 3.21)                    |                     | 1.41 (1.15 to 1.73)                         |                     |
| ≥11 mmol/L            | 3.76 (2.90 to 4.87)                    |                     | 1.53 (1.17 to 2.00)                         |                     |

\* Each Cox proportional hazards models adjusted for sex, CRB-65 class, co-morbidities and smoking status.

**Supplementary Table 3:** Association of glucose levels with 90-day mortality, stratified according to low (CRB-65 of 0), moderate (CRB-65 score of 1 or 2) or high (CRB-65 score of 3 or 4) severity of pneumonia.

|                       | Crude analyses Hazard ratio      |       |                     |        |                     |      |
|-----------------------|----------------------------------|-------|---------------------|--------|---------------------|------|
|                       | CRB-65 Score                     |       |                     |        |                     |      |
|                       | 0 (n=2461)                       |       | 1 or 2 (n=3463)     |        | 3 or 4 (n=218)      |      |
| <b>Glucose levels</b> |                                  |       |                     |        |                     |      |
| <4 mmol/L             | 0.45 (0.06 to 3.28)              | 0.004 | 0.87 (0.46 to 1.63) | <0.001 | 1.68 (0.48 to 5.88) | 0.47 |
| 4-<6 mmol/L           | 1.00 (ref)                       |       | 1.00 (ref)          |        | 1.00 (ref)          |      |
| 6-<11 mmol/L          | 1.99 (0.88 to 4.49)              |       | 2.01 (1.52 to 2.66) |        | 1.46 (0.73 to 2.93) |      |
| 11-<14 mmol/L         | 2.44 (0.31 to 19.03)             |       | 2.35 (1.53 to 3.62) |        | 1.26 (0.51 to 3.10) |      |
| ≥14 mmol/L            | 5.40 (1.19 to 24.52)             |       | 3.88 (2.54 to 5.93) |        | 1.87 (0.70 to 5.04) |      |
|                       |                                  |       |                     |        |                     |      |
|                       | Adjusted analyses Hazard ratio * |       |                     |        |                     |      |
|                       | CRB-65 Score                     |       |                     |        |                     |      |
|                       | 0 (n=2461)                       |       | 1 or 2 (n=3463)     |        | 3 or 4 (n=218)      |      |
| <b>Glucose levels</b> |                                  |       |                     |        |                     |      |
| <4 mmol/L             | 0.55 (0.08 to 4.01)              | 0.035 | 0.94 (0.50 to 1.78) | <0.001 | 1.35 (0.38 to 4.76) | 0.70 |
| 4-<6 mmol/L           | 1.00 (ref)                       |       | 1.00 (ref)          |        | 1.00 (ref)          |      |
| 6-<11 mmol/L          | 1.79 (0.78 to 4.15)              |       | 1.65 (1.24 to 2.19) |        | 1.37 (0.66 to 2.81) |      |
| 11-<14 mmol/L         | 2.21 (0.24 to 20.22)             |       | 1.74 (1.12 to 2.70) |        | 0.90 (0.43 to 2.76) |      |
| ≥14 mmol/L            | 5.79 (0.74 to 45.25)             |       | 3.00 (1.96 to 4.61) |        | 1.61 (0.55 to 4.12) |      |

\* each Cox proportional hazards models adjusted for sex, CRB-65 class, co-morbidities and smoking status.

P values for interaction between trend across glucose levels and CRB-65 scores were 0.051 for crude and 0.036 for adjusted analyses.



**Supplementary Table 4:** Landmark analysis using multiple imputation

|                         | <b>Crude hazard ratios</b> |                    |                                                             |                    | <b>Adjusted hazard ratios</b> |                    |                                                             |                    |
|-------------------------|----------------------------|--------------------|-------------------------------------------------------------|--------------------|-------------------------------|--------------------|-------------------------------------------------------------|--------------------|
|                         | <i>0 to 28d mortality</i>  | <i>P for trend</i> | <i>28 to 90d mortality, excluding events within 28 days</i> | <i>P for trend</i> | <i>0 to 28d mortality</i>     | <i>P for trend</i> | <i>28 to 90d mortality, excluding events within 28 days</i> | <i>P for trend</i> |
| <b>Glucose levels</b>   | <i>1.07 (0.59 to 1.97)</i> | <b>0.001</b>       | <i>0.49 (0.17 to 1.37)</i>                                  | <b>0.65</b>        | <i>1.26 (0.68 to 2.32)</i>    | <b>0.003</b>       | <i>0.57 (0.20 to 1.61)</i>                                  | <b>0.57</b>        |
| <b>4-&lt;6 mmol/L</b>   | <i>1.00 (reference)</i>    |                    | <i>1.00 (reference)</i>                                     |                    | <i>1.00 (reference)</i>       |                    | <i>1.00 (reference)</i>                                     |                    |
| <b>6-&lt;11 mmol/L</b>  | <i>2.88 (2.11 to 3.94)</i> |                    | <i>2.95 (2.04 to 4.28)</i>                                  |                    | <i>1.52 (1.10 to 2.10)</i>    |                    | <i>1.70 (1.17 to 2.49)</i>                                  |                    |
| <b>11-&lt;14 mmol/L</b> | <i>4.56 (2.86 to 7.26)</i> |                    | <i>3.27 (1.76 to 6.07)</i>                                  |                    | <i>1.49 (0.92 to 2.42)</i>    |                    | <i>1.33 (0.70 to 2.52)</i>                                  |                    |
| <b>≥14 mmol/L</b>       | <i>8.29 (5.43 to 12.7)</i> |                    | <i>2.52 (1.13 to 5.64)</i>                                  |                    | <i>2.93 (1.88 to 4.58)</i>    |                    | <i>1.12 (0.49 to 2.56)</i>                                  |                    |

**P values for interaction between trend across glucose levels and time (0 to 28 days versus 21 to 90 days) were 0.13 for crude and 0.08 for adjusted analyses.**

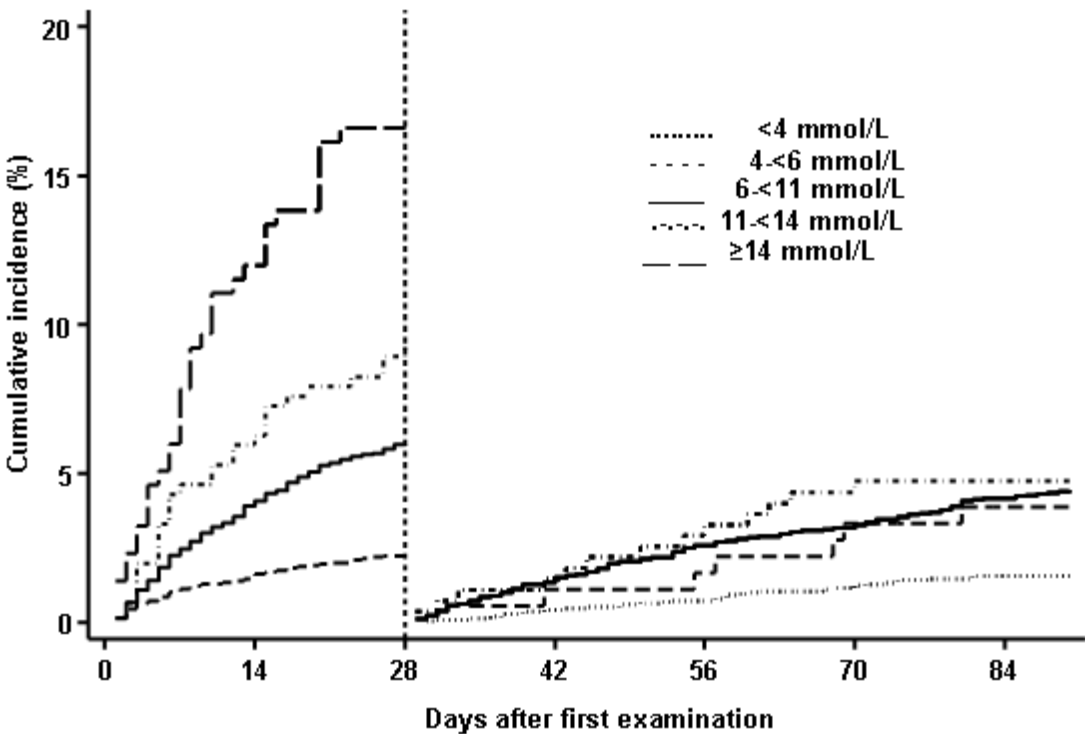

**Supplementary Figure 4:** Kaplan-Meier-Plot for the Landmark analysis (crude analysis). Mortality is truncated at 28 days. After 28 days mortality increases but this increase is independent from glucose levels in an adjusted analysis.

**Supplementary Table 5:** Comparison of patients with and without complete mortality data.

|                                    | <b>Complete data on<br/>vital status<br/>(n=6891)</b> | <b>Missing data on<br/>vital status<br/>(n=509)</b> | <b>P-value</b> |
|------------------------------------|-------------------------------------------------------|-----------------------------------------------------|----------------|
| <b>Gender</b>                      |                                                       |                                                     | 0.07           |
| Female                             | 3086 (45%)                                            | 207 (41%)                                           |                |
| Male                               | 3805 (55%)                                            | 302 (59%)                                           |                |
| <b>CRB-65</b>                      |                                                       |                                                     | <0.001         |
| 0                                  | 2461 (36%)                                            | 90 (18%)                                            |                |
| 1                                  | 2513 (36%)                                            | 93 (18%)                                            |                |
| 2                                  | 950 (14%)                                             | 139 (27%)                                           |                |
| 3                                  | 195 (3%)                                              | 75 (15%)                                            |                |
| 4                                  | 23 (0%)                                               | 11 (2%)                                             |                |
| Missing                            | 749 (11%)                                             | 101 (20%)                                           |                |
| <b>Glucose level</b>               |                                                       |                                                     | <0.001         |
| <4 mmol/L                          | 484 (7%)                                              | 17 (3%)                                             |                |
| 4-<6 mmol/L                        | 2244 (33%)                                            | 121 (24%)                                           |                |
| 6-<11 mmol/L                       | 2768 (40%)                                            | 232 (46%)                                           |                |
| 11-<14 mmol/L                      | 303 (4%)                                              | 45 (9%)                                             |                |
| ≥14 mmol/L                         | 217 (3%)                                              | 34 (7%)                                             |                |
| Missing                            | 875 (13%)                                             | 60 (12%)                                            |                |
| <b>Diabetes mellitus</b>           |                                                       |                                                     | <0.001         |
| No                                 | 5756 (84%)                                            | 369 (73%)                                           |                |
| Yes                                | 1114 (16%)                                            | 133 (26%)                                           |                |
| Missing                            | 21 (0%)                                               | 7 (1%)                                              |                |
| <b>Chronic respiratory disease</b> |                                                       |                                                     | 0.04           |
| No                                 | 4394 (64%)                                            | 340 (67%)                                           |                |
| Yes                                | 2466 (36%)                                            | 156 (31%)                                           |                |
| Missing                            | 31 (0%)                                               | 13 (3%)                                             |                |
| <b>Malignant tumor</b>             |                                                       |                                                     | 0.79           |
| No                                 | 6204 (90%)                                            | 441 (87%)                                           |                |
| Yes                                | 648 (9%)                                              | 48 (9%)                                             |                |
| Missing                            | 39 (1%)                                               | 20 (4%)                                             |                |
| <b>Chronic liver disease</b>       |                                                       |                                                     | <0.001         |
| No                                 | 6644 (96%)                                            | 465 (91%)                                           |                |
| Yes                                | 214 (3%)                                              | 31 (6%)                                             |                |
| Missing                            | 33 (0%)                                               | 13 (3%)                                             |                |
| <b>Congestive heart failure</b>    |                                                       |                                                     | <0.001         |
| No                                 | 5596 (81%)                                            | 341 (67%)                                           |                |
| Yes                                | 1265 (18%)                                            | 159 (31%)                                           |                |
| Missing                            | 30 (0%)                                               | 9 (2%)                                              |                |
| <b>Cerebrovascular disease</b>     |                                                       |                                                     | <0.001         |
| No                                 | 6140 (89%)                                            | 322 (63%)                                           |                |
| Yes                                | 722 (10%)                                             | 177 (35%)                                           |                |
| Missing                            | 29 (0%)                                               | 10 (2%)                                             |                |
| <b>Chronic renal disease</b>       |                                                       |                                                     | <0.001         |
| No                                 | 6291 (91%)                                            | 415 (82%)                                           |                |
| Yes                                | 566 (8%)                                              | 83 (16%)                                            |                |
| Missing                            | 34 (0%)                                               | 11 (2%)                                             |                |
| <b>Current smoking</b>             |                                                       |                                                     | 0.09           |
| No                                 | 4656 (68%)                                            | 327 (64%)                                           |                |
| Yes                                | 2072 (30%)                                            | 121 (23%)                                           |                |
| Missing                            | 163 (2%)                                              | 61 (12%)                                            |                |

**Supplementary Table 6:** Comparison of all patients with complete death data, with and without complete glucose data.

|                                    | <b>Patients with complete covariate data (n=5231)</b> | <b>Patients with missing covariate data (n=1660)</b> | <b>P-value</b> |
|------------------------------------|-------------------------------------------------------|------------------------------------------------------|----------------|
| <b>Mortality</b>                   |                                                       |                                                      | 0.001          |
| No                                 | 4872 (93%)                                            | 1505 (91%)                                           |                |
| Yes                                | 359 (7%)                                              | 155 (9%)                                             |                |
| <b>Gender</b>                      |                                                       |                                                      | 0.044          |
| Female                             | 2307 (44%)                                            | 779 (47%)                                            |                |
| Male                               | 2924 (56%)                                            | 881 (53%)                                            |                |
| <b>CRB-65</b>                      |                                                       |                                                      | 0.001          |
| 0                                  | 2066 (40%)                                            | 395 (43%)                                            |                |
| 1                                  | 2197 (42%)                                            | 316 (35%)                                            |                |
| 2                                  | 789 (15%)                                             | 161 (18%)                                            |                |
| 3                                  | 162 (3%)                                              | 33 (4%)                                              |                |
| 4                                  | 17 (0%)                                               | 6 (1%)                                               |                |
| <b>Glucose level</b>               |                                                       |                                                      | 0.51           |
| <4 mmol/L                          | 420 (8%)                                              | 64 (8%)                                              |                |
| 4-<6 mmol/L                        | 1943 (37%)                                            | 301 (38%)                                            |                |
| 6-<11 mmol/L                       | 2422 (46%)                                            | 346 (44%)                                            |                |
| 11-<14 mmol/L                      | 255 (5%)                                              | 48 (6%)                                              |                |
| ≥14 mmol/L                         | 191 (4%)                                              | 26 (3%)                                              |                |
| <b>Diabetes mellitus</b>           |                                                       |                                                      | 0.002          |
| No                                 | 4343 (83%)                                            | 1413 (86%)                                           |                |
| Yes                                | 888 (17%)                                             | 226 (14%)                                            |                |
| <b>Chronic respiratory disease</b> |                                                       |                                                      | 0.10           |
| No                                 | 3323 (64%)                                            | 1071 (66%)                                           |                |
| Yes                                | 1908 (36%)                                            | 558 (34%)                                            |                |
| <b>Malignant tumor</b>             |                                                       |                                                      | 0.061          |
| No                                 | 4717 (90%)                                            | 1487 (91%)                                           |                |
| Yes                                | 514 (10%)                                             | 134 (8%)                                             |                |
| <b>Chronic liver disease</b>       |                                                       |                                                      | 0.65           |
| No                                 | 5065 (97%)                                            | 1579 (97%)                                           |                |
| Yes                                | 166 (3%)                                              | 48 (3%)                                              |                |
| <b>Congestive heart failure</b>    |                                                       |                                                      | 0.54           |
| No                                 | 4275 (82%)                                            | 1321 (81%)                                           |                |
| Yes                                | 956 (18%)                                             | 309 (19%)                                            |                |
| <b>Cerebrovascular disease</b>     |                                                       |                                                      | <0.001         |
| No                                 | 4723 (90%)                                            | 1417 (87%)                                           |                |
| Yes                                | 508 (10%)                                             | 214 (13%)                                            |                |
| <b>Chronic renal disease</b>       |                                                       |                                                      | 0.005          |
| No                                 | 4772 (91%)                                            | 1519 (93%)                                           |                |
| Yes                                | 459 (9%)                                              | 107 (7%)                                             |                |
| <b>Current smoking</b>             |                                                       |                                                      | 0.41           |
| No                                 | 3633 (69%)                                            | 1023 (68%)                                           |                |
| Yes                                | 1598 (31%)                                            | 474 (32%)                                            |                |

**Supplementary Table 7:** Complete case analysis of 90-day mortality in all patients with CAP and complete covariate data.

|                           | <b>Crude analyses<br/>Hazard ratio</b> | <b>p-<br/>value</b> | <b>Adjusted analyses<br/>Hazard ratio</b> | <b>p-<br/>value</b> |
|---------------------------|----------------------------------------|---------------------|-------------------------------------------|---------------------|
| <b>Diabetes</b>           |                                        | <0.001              |                                           | 0.011               |
| No                        | 1.00 (ref)                             |                     | 1.00 (ref)                                |                     |
| Yes                       | 2.40 (1.92 to 3.00)                    |                     | 1.38 (1.08 to 1.76)                       |                     |
| <b>Glucose levels</b>     |                                        | <0.001              |                                           | <0.001              |
| <4 mmol/L                 | 0.83 (0.45 to 1.53)                    |                     | 0.94 (0.49 to 1.79)                       |                     |
| 4-<6 mmol/L               | 1.00 (ref)                             |                     | 1.00 (ref)                                |                     |
| 6-<11 mmol/L              | 2.68 (2.04 to 3.53)                    |                     | 1.54 (1.15 to 2.06)                       |                     |
| 11-<14 mmol/L             | 3.59 (2.34 to 5.53)                    |                     | 1.65 (1.04 to 2.63)                       |                     |
| ≥14 mmol/L                | 5.35 (3.51 to 8.15)                    |                     | 2.21 (1.37 to 3.57)                       |                     |
| <b>Combined</b>           |                                        | <0.001              |                                           | <0.001              |
| No diabetes, low glucose  | 1.00 (ref)                             |                     | 1.00 (ref)                                |                     |
| No diabetes, high glucose | 3.10 (2.33 to 4.12)                    |                     | 1.69 (1.24 to 2.30)                       |                     |
| Diabetes                  | 4.90 (3.75 to 6.39)                    |                     | 2.01 (1.44 to 2.80)                       |                     |

**Each Cox proportional hazards models adjusted for sex, CRB-65 class, co-morbidities and smoking status. High glucose defines as glucose levels  $\geq 6$  mmol/L. \*P values for trend across glucose levels**
