# Supplementary material
Source: PubMed Central journal article supplement (PMC4790028)
Supplement: lepp001743.ww2_default.pdf [file lepp001743.ww2_default.pdf]

## Appendix

Members of the CAPNETZ study group except the authors:

B. Hauptmeier (University Hospital Bergmannsheil, Dept. of Pneumology, Allergology and Sleep Medicine, Bochum, Germany), H. von Baum, R. Marre (University Hospital of Ulm, Ulm, Germany), T. Schaberg, I. Hering (Dept. of Pneumology, Diakoniekrankenhaus Rotenburg, Rotenburg, Germany), K. Dalhoff, P. Heyer (Department of Internal Medicine III, Pneumology, University Hospital Schleswig-Holstein, Lübeck, Germany), F. Kunitz (HELIOS Klinikum Emil von Behring, Berlin, Germany), H. Schütte, A. Tessmer (Department of Infectious Disease and Respiratory Medicine, Charité-University Medicine, Berlin, Germany), D. Stolz (Dept. of Pneumology, University Hospital Basel, Basel, Switzerland), J. Rademacher (Department of Respiratory Medicine, Hannover Medical School, Hannover, Germany), A. Gillissen (Dept. of Pneumology, Klinikum Kassel, Kassel, Germany), B. Drewelow, J. Majcher-Peszynska (Center of Pharmacology and Toxicology, Institute of Clinical Pharmacology, University of Rostock, Rostock, Germany), S. Krüger (Medical Clinic I, University Hospital RWTH, Aachen, Germany), P. Martus (Institute for Biostatistics and Clinical Epidemiology, Charité University Medicine, Berlin, Germany), T. Illmann, M. Wallner (2mt Software GmbH, Ulm, Germany), G. Barten, L. Gosman (Main Office, Hannover, Germany) and all study nurses.
